# Supplementary material for: Spatial Probability Dynamically Modulates Visual Target Detection in Chickens
Source: PubMed Central journal article supplement (PMC3667102; doi:10.1371/journal.pone.0064136), 2013-05-29

Figure S9

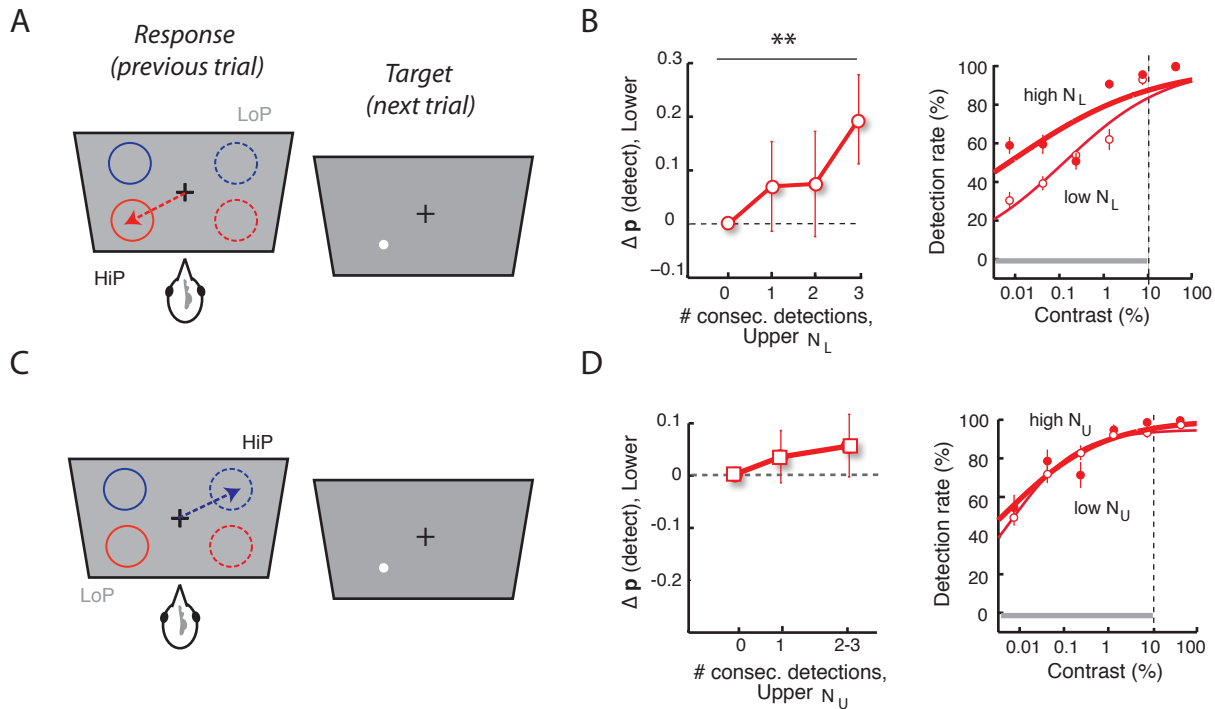

Supplement: pone.0064136.s009.pdf [file pone.0064136.s009.pdf]
